# Supplementary material for: Psychological Interventions for Higher Education Students in Europe: A Systematic Literature Review
Source: MDPI journal article supplement (doi:10.3390/youth2030017), 2022-06-28
Supplement: s1 [file s1]

Table S1. Results of the systematic review on psychological interventions for higher education students

| Categories                      | Year | Authors                                              | Title                                                                                                                   | Source                                          | Intervention                                                                                                                                                                                                                                     | Results                                                                                                                                                                                                                                                                                                                                                                                                                                                                                                                                            | Country |
|---------------------------------|------|------------------------------------------------------|-------------------------------------------------------------------------------------------------------------------------|-------------------------------------------------|--------------------------------------------------------------------------------------------------------------------------------------------------------------------------------------------------------------------------------------------------|----------------------------------------------------------------------------------------------------------------------------------------------------------------------------------------------------------------------------------------------------------------------------------------------------------------------------------------------------------------------------------------------------------------------------------------------------------------------------------------------------------------------------------------------------|---------|
| Counseling and Group Counseling | 2019 | Maselli, M., Gobbi, E., & Carraro, A.                | Effectiveness of individual counseling and activity monitors to promote physical activity among university students     | Journal of Sports Medicine and Physical Fitness | Individual counselling sessions (based on the social cognitive theory and the transtheoretical model of behavior change) via videoconferencing calls vs. wearable Physical activity (PA) monitors designed to motivate to PA vs. no intervention | Students in the individual counselling group increased self-reported energy expenditure between T0 and T1, and maintained this improvement at T2. No significant differences were found neither in the group of students who used the PA monitors nor in the control group                                                                                                                                                                                                                                                                         | Italy   |
|                                 | 2019 | Østergård, O. K., Fenger, M., & Hougaard, E.         | Symptomatic distress and effectiveness of psychological treatments delivered at a nationwide student counseling service | Counselling of Psychology Quarterly             | Short-term individual or group counseling focusing on the current problems of the clients                                                                                                                                                        | Results showed that the Danish Student Counseling Service was effective in relieving symptomatic distress in highly distressed student clients. Results showed a moderate-to-large pre- to post-intervention ( $ES = 0.76$ ).<br>In particular, ending counseling by agreement between counselor and client predicted better outcome than ending counseling by client cancellation or failing to appear ( $n = 64$ , $M_{gsi} = 1.04$ , $p < .001$ ) and referred to or started in another treatment ( $n = 94$ , $M_{gsi} = 1.15$ , $p < .001$ ). | Denmark |
|                                 | 2020 | Esposito, G., Marano, D., & Freda, M. F.             | Supportive and interpretative interventions in fostering mentalisation during counselling.                              | British Journal of Guidance & Counselling       | Two group counselling interventions designed to promote mentalization in underachieving university student                                                                                                                                       | Results showed that only one group improved in terms of mentalization and academic performance. In the good-outcome group, there were more defence interpretations, especially during the early sessions, and a deeper level of elaboration                                                                                                                                                                                                                                                                                                        | Italy   |
|                                 | 2017 | Biasi, V., Patrizi, N., Mosca, M., & De Vincenzo, C. | The effectiveness of university counselling for improving academic outcomes and well-being                              | British Journal of Guidance & Counselling       | Counselling treatment aimed at enhancing students' academic success                                                                                                                                                                              | Results showed a statistically significant decrease in internalizing and externalizing problems, distress symptoms and relationship difficulties. Compared with the control group, students who received counselling exhibited a significant recovery regarding their progress with their studies                                                                                                                                                                                                                                                  | Italy   |

|                                |      |                                                                                                             |                                                                                                                                                   |                                                 |                                                                                                                                                                 |                                                                                                                                                                                                                                                |                   |
|--------------------------------|------|-------------------------------------------------------------------------------------------------------------|---------------------------------------------------------------------------------------------------------------------------------------------------|-------------------------------------------------|-----------------------------------------------------------------------------------------------------------------------------------------------------------------|------------------------------------------------------------------------------------------------------------------------------------------------------------------------------------------------------------------------------------------------|-------------------|
|                                | 2016 | Strepparav<br>a, M., Bani,<br>M., Zorzi,<br>F., Corrias,<br>D., Dolce,<br>R., &<br>Rezzonico,<br>G.         | Cognitive<br>intervention:<br>effectiveness in an Italian<br>university centre                                                                    | British Journal of<br>Guidance &<br>Counselling | Cognitive-relational intervention<br>& focused on the development of<br>reappraisal skills and problem-<br>solving strategies to manage<br>difficult situations | Results showed a significant pre- and<br>post-intervention reduction in self-<br>reported psychopathological symptoms<br>as well as in general levels of distress.<br>Moreover, results showed a significant<br>increase in reappraisal levels | Italy             |
|                                | 2015 | Hofmann,<br>F. H.,<br>Sperth, M.,<br>& Holm-<br>Hadulla, R.<br>M.                                           | Methods and effects of<br>integrative counseling and<br>short-term psychotherapy<br>for students                                                  | Mental Health and<br>Prevention                 | Comprehensive model of<br>counseling integrating practically<br>relevant approaches                                                                             | The integrative counseling is effective in<br>reducing psychopathology and distress<br>as well as in restoring satisfaction with<br>life and studies                                                                                           | Germany           |
|                                | 2015 | McKenzie,<br>K.,<br>Murray, K.<br>R., Murray,<br>A. L., &<br>Richelieu,<br>M.                               | The effectiveness of<br>university counselling for<br>students with academic<br>issues                                                            | Counselling and<br>Psychotherapy<br>Research    | Counselling                                                                                                                                                     | Results suggested that counselling<br>resulted in reliable clinically significant<br>change for 40% of students reporting<br>academic issues                                                                                                   | United<br>Kingdom |
|                                | 2012 | Vassilopou<br>los, S. P., &<br>Brouzos,<br>A.                                                               | A pilot person-centred group<br>counselling for university<br>students: Effects on social<br>anxiety and self-esteem.                             |                                                 | Cognitive-behavioral<br>and<br>psychodynamic counselling                                                                                                        | At post treatment, all students improved<br>both in terms of well-being and distress,<br>regardless of the type of psychotherapy<br>received. This improvement emerged<br>both by students' self-reported and<br>clinicians' evaluations       | Italy             |
| Psychodynamic<br>Interventions | 2020 | Cerutti, R.,<br>Fontana,<br>A., Ghezzi,<br>V.,<br>Menozzi,<br>F.,<br>Spensieri,<br>V., &<br>Tambelli,<br>R. | Exploring<br>psychopathological distress<br>in Italian university students<br>seeking help: A picture from<br>a university counselling<br>service | Current<br>Psychology                           | Brief<br>intervention<br>psychodynamic                                                                                                                          | Results showed an average significant<br>and reliable decrease in all<br>psychopathological syndromes, although<br>the rate of this change was not uniform<br>for all individuals                                                              | Italy             |

|                                    |      |                                                                             |                                                                                                                                                                                 |                                           |                                                                                                                                                 |                                                                                                                                                                                                                                                                                                                          |         |
|------------------------------------|------|-----------------------------------------------------------------------------|---------------------------------------------------------------------------------------------------------------------------------------------------------------------------------|-------------------------------------------|-------------------------------------------------------------------------------------------------------------------------------------------------|--------------------------------------------------------------------------------------------------------------------------------------------------------------------------------------------------------------------------------------------------------------------------------------------------------------------------|---------|
|                                    | 2017 | Amodeo, A. L., Picariello, S., Valerio, P., Bochicchio, V., & Scandurra, C. | Group psychodynamic counselling with final-year undergraduates in clinical psychology: A clinical methodology to reinforce academic identity and psychological well-being       | Psychodynamic Practice                    | Group psychodynamic counselling                                                                                                                 | Students showed that the intervention made students feel more capable of managing their lives and more open to new experiences. Moreover, it encouraged them to perceive their relationships as more positive and satisfying, to believe that their life was meaningful, and to achieve greater self-acceptance          | Italy   |
|                                    | 2017 | Vescovelli, F., Melani, P., Ruini, C., Ricci Bitti, P. E., & Monti, F.      | University Counseling Service for Improving Students' Mental Health                                                                                                             | Psychological Services                    | Individual cognitive-behavioral psychotherapy vs. psychodynamic psychotherapy                                                                   | At post-treatment, all students improved in terms of both well-being and distress                                                                                                                                                                                                                                        | Italy   |
|                                    | 2016 | Monti, F., Tonetti, L., & Ricci Bitti, P. E.                                | Short-term effectiveness of psychotherapy treatments delivered at a university counselling service                                                                              | British Journal of Guidance & Counselling | Psychodynamic psychotherapy or cognitive-behavioral psychotherapy                                                                               | Significant improvements were observed both after treatment and at the 6-months follow-up. Furthermore, no significant differences were observed between the end of psychotherapy and the follow-up                                                                                                                      | Italy   |
|                                    | 2014 | Monti, F., Tonetti, L., & Ricci Bitti, P. E.                                | Comparison of cognitive-behavioural therapy and psychodynamic therapy in the treatment of anxiety among university students: an effectiveness study                             | British Journal of Guidance & Counselling | Cognitive-behavioral (CBT) and psychodynamic (PDT) therapies in the treatment of anxiety                                                        | Results showed that both treatments led to a significant decrease in students' anxious symptomatology                                                                                                                                                                                                                    | Italy   |
|                                    | 2013 | Monti, F., Tonetti, L., & Ricci Bitti, P. E.                                | Effectiveness of psychological treatments delivered at a counseling service for students                                                                                        | Psychological Reports                     | Four sessions of psychological consultation, follow by a psychotherapeutic treatment if needed                                                  | Significant improvements were observed after therapy in depression, somatization, and hostility-irritability                                                                                                                                                                                                             | Italy   |
| Cognitive-behavioral Interventions | 2020 | Van der Oord, S., Boyer, B. E., Van Dyck, L., Mackay, K. J., De Meyer, H.,  | A Randomized Controlled Study of a Cognitive Behavioral Planning Intervention for College Students With ADHD: An Effectiveness Study in Student Counseling Services in Flanders | Journal of Attention Disorders            | of Short (six session) individual cognitive-behavioral planning intervention for college students with attention-deficit/hyperactivity disorder | Results showed a significant interaction on inattention symptoms: students in the treatment condition improved from pre-test to post-test, whereas students in the waitlist did not. Other measures showed large significant time effects (improved skills and reduction of symptoms in both groups) but no interactions | Belgium |

|      |                                                                                                                             |                                                                                                                                                                                        |                                                                           |                                                                                                                                                                                            |                                                                                                                                                                                                                                                                                                                                                     |         |
|------|-----------------------------------------------------------------------------------------------------------------------------|----------------------------------------------------------------------------------------------------------------------------------------------------------------------------------------|---------------------------------------------------------------------------|--------------------------------------------------------------------------------------------------------------------------------------------------------------------------------------------|-----------------------------------------------------------------------------------------------------------------------------------------------------------------------------------------------------------------------------------------------------------------------------------------------------------------------------------------------------|---------|
|      | & Baeyens, D.                                                                                                               |                                                                                                                                                                                        |                                                                           |                                                                                                                                                                                            |                                                                                                                                                                                                                                                                                                                                                     |         |
| 2019 | Martín-Pérez, C., Navas, J. F., Perales, J. C., López-Martín, Á., Cordovilla-Guardia, S., Portillo, M., ... Vilar-López, R. | Brief group-delivered motivational interviewing is equally effective as brief group-delivered cognitive-behavioral therapy at reducing alcohol use in risky college drinkers           | Plos One                                                                  | Cognitive-Behavioral Therapy (CBT) and Motivational Interviewing (MI), aimed at reducing alcohol consumption                                                                               | Alcohol use decreased in both groups at the 3- and 6-months measurement points                                                                                                                                                                                                                                                                      | Spain   |
| 2019 | Reiss, N., Warnecke, I., Tibubos, A. N., Tolgou, T., Luka-Krausgrill, U., & Rohrmann, S.                                    | Effects of cognitive-behavioral therapy with relaxation vs. imagery rescripting on psychophysiological stress responses of students with test anxiety in a randomized controlled trial | Psychotherapy Research: journal of the Society for Psychotherapy Research | Group treatment for test anxiety based on cognitive behavioral therapy, including relaxation techniques (CBT + R) or imagery rescripting (CBT + ImRs) vs. a moderated self-help group (SH) | In all treatment groups, self-reported state anxiety in a stressful socially evaluative situation declined after treatment. No significant reduction of physiological reactivity scores after intervention was found in any of the three groups                                                                                                     | Germany |
| 2019 | Terp, U., Hjärthag, F., & Bisholt, B.                                                                                       | Effects of a Cognitive Behavioral-Based Stress Management Program on Stress Management Competency, Self-efficacy and Self-esteem Experienced by Nursing Students                       | Nurse Educator                                                            | 10-week cognitive-behavioral therapy-based stress management program                                                                                                                       | Students' perceived stress management competency, self-efficacy, and self-esteem were higher 1 year after the intervention                                                                                                                                                                                                                          | Sweden  |
| 2018 | Rozental, A., Forsström, D., Lindner, P., Nilsson, S., Mårtensson, L.,                                                      | Treating Procrastination Using Cognitive Behavior Therapy: A Pragmatic Randomized Controlled Trial Comparing Treatment Delivered via the Internet or in Groups                         | Behavior Therapy                                                          | 8 weeks self-guided CBT via the Internet (ICBT) vs. group CBT to reduce procrastination                                                                                                    | Results showed large within-group effect sizes on procrastination, and small to moderate benefits for depression, anxiety, and well-being. No differences between conditions were observed after the treatment period; however, participants in group CBT continued or maintained their improvement at follow-up, while participants in self-guided | Sweden  |

|      |                                                                                       |                                                                                                                                             |                                     |                                                                                                                                                                 |                                                                                                                                                                                                                                                                                                                                                                                                                                                                                                                                                                                               |                |
|------|---------------------------------------------------------------------------------------|---------------------------------------------------------------------------------------------------------------------------------------------|-------------------------------------|-----------------------------------------------------------------------------------------------------------------------------------------------------------------|-----------------------------------------------------------------------------------------------------------------------------------------------------------------------------------------------------------------------------------------------------------------------------------------------------------------------------------------------------------------------------------------------------------------------------------------------------------------------------------------------------------------------------------------------------------------------------------------------|----------------|
|      | Rizzo, A.,<br>...<br>Carlbring,<br>P.                                                 |                                                                                                                                             |                                     |                                                                                                                                                                 | ICBT showed some signs of deterioration                                                                                                                                                                                                                                                                                                                                                                                                                                                                                                                                                       |                |
| 2018 | Thorisdottir, A. S., Tryggvadottir, A., Saevarsson, S. T., & Bjornsson, A. S.         | Brief report: sudden gains in cognitive-behavioral group therapy and group psychotherapy for social anxiety disorder among college students | Cognitive Behaviour Therapy         | Cognitive-behavioral group therapy (CBGT) vs. group psychotherapy (GPT; designed to incorporate only non-specific factors) for social anxiety disorder          | The 22.2% participants experienced large symptoms improvements between adjacent treatment sessions: improvements appeared at similar rates across both treatments, but were associated with greater improvements at post-treatment and follow-up in GPT group compared to CBGT group                                                                                                                                                                                                                                                                                                          | Iceland        |
| 2017 | Reiss, N., Warnecke, I., Tolgou, T., Krampen, D., Luka-Krausgrill, U., & Rohrmann, S. | Effects of cognitive behavioral therapy with relaxation vs. imagery rescripting on test anxiety: A randomized controlled trial              | Journal of Affective Disorders      | of Intervention program comprising elements of cognitive-behavioral treatments and skill-focused techniques, additionally supplemented by relaxation techniques | Results showed a significant reduction of test anxiety from baseline to six-month follow-up                                                                                                                                                                                                                                                                                                                                                                                                                                                                                                   | Germany        |
| 2016 | Larsson, A., Hooper, N., Osborne, L. A., Bennett, P., & McHugh, L.                    | Using Brief Cognitive Restructuring and Cognitive Defusion Techniques to Cope With Negative Thoughts                                        | Behavior Modification               | Cognitive restructuring and a cognitive defusion techniques aimed at coping with a personally relevant negative thought                                         | Findings indicated that defusion lowered believability, increased comfort and willingness to have the target thought, and increased positive affect significantly more than the control and cognitive restructuring. Within groups, cognitive restructuring also made significant gains in target thought discomfort, negativity, and "willingness to have" in the same direction as defusion, but the no-instruction control did not. Negative thought frequency was reduced in the defusion group, maintained in the restructuring group, and increased in the no-instruction control group | United Kingdom |
| 2016 | Marrero, R. J., Carballeira, M., Martín, S., Mejías,                                  | Effectiveness of a positive psychology intervention combined with cognitive behavioral therapy in university students                       | Anales Psicología/Annals Psychology | De Positive intervention combined with cognitive-behavioral therapy to enhance subjective and psychological well-being                                          | The intervention group reported greater social support after the intervention period than the waiting-list control group. Within-group differences were found for happiness, self-acceptance,                                                                                                                                                                                                                                                                                                                                                                                                 | Spain          |

|      |                                                                            |                                                                                                                                                                          |                                                   |                                                                                                                                                            |                                                                                                                                                                                                                                                                                                |             |
|------|----------------------------------------------------------------------------|--------------------------------------------------------------------------------------------------------------------------------------------------------------------------|---------------------------------------------------|------------------------------------------------------------------------------------------------------------------------------------------------------------|------------------------------------------------------------------------------------------------------------------------------------------------------------------------------------------------------------------------------------------------------------------------------------------------|-------------|
|      | M., & Hernández, J. A.                                                     |                                                                                                                                                                          |                                                   |                                                                                                                                                            | positive relations with others, optimism, and self-esteem in the intervention group                                                                                                                                                                                                            |             |
| 2015 | Thorgeirsdottir, M. T., Bjornsson, A. S., & Arnkelsson, G. B.              | Group Climate Development in Brief Group Therapies: A Comparison Between Cognitive-Behavioral Group Therapy and Group Psychotherapy for Social Anxiety Disorder          | Group Dynamics-Theory Research and Practice       | Brief cognitive-behavioral group therapy (CBGT) vs. brief group psychotherapy (GPT) for students with a primary diagnosis of social anxiety disorder (SAD) | Similar patterns were found in both treatment conditions: engagement increased throughout the sessions, avoidance decreased, and conflict was overall low                                                                                                                                      | Iceland     |
| 2014 | Bernhardsdottir, J., Champion, J. D., & Skärsäter, I.                      | The experience of participation in a brief cognitive behavioural group therapy for psychologically distressed female university students                                 | Journal of Psychiatric And Mental Health Nursing  | Cognitive-behavioral group therapy for psychological distress in female university students                                                                | Participants reported positive outcomes, especially a more balanced thinking, more self-confidence and an improvement in depth reflections skills                                                                                                                                              | Iceland     |
| 2013 | Bernhardsdottir, J., Vilhjalmsón, R., & Champion, J. D.                    | Evaluation of a brief Cognitive Behavioral Group Therapy for Psychological Distress among Female Icelandic University Students                                           | Issues in Mental Health Nursing                   | Four sessions cognitive-behavioral group therapy                                                                                                           | Students in the intervention group experienced significantly lower levels of depression and anxiety symptoms compared to the control group post-test                                                                                                                                           | Iceland     |
| 2012 | Vázquez, F. L., Torres, A., Blanco, V., Díaz, O., Otero, P., & Hermida, E. | Comparison of relaxation training with a cognitive-behavioural intervention for indicated prevention of depression in university students: a randomized controlled trial | Journal of Psychiatric Research                   | Relaxation training (RT) vs. cognitive-behavioral program (CBT) aimed at preventing depression in students with elevated depressive symptoms               | Anxiety symptoms were significantly improved by both interventions at 3-months follow-up and by CBT also at 6-months follow-up. In the medium term (3–6 months), RT produced similar reductions in depressive and anxiety symptoms as a more complex CBT program                               | Spain       |
| 2011 | Schuck, K., Keijsers, G. P., & Rinck, M.                                   | The effects of brief cognitive-behaviour therapy for pathological skin picking: A randomized comparison to wait-list control                                             | Behaviour Research and Therapy                    | Four-sessions cognitive-behavioral treatment for college students suffering from pathological skin picking                                                 | Participants in the treatment condition showed a significantly larger reduction on all measured variables in comparison to the waiting-list condition. The obtained effect sizes for the outcome measures were large, ranging from .90 to 1.89. Treatment effects were maintained at follow-up | Netherlands |
| 2010 | Koutra, A., Katsiadra mi, A., &                                            | The effect of group psychological counselling in                                                                                                                         | European Journal of Psychotherapy and Counselling | Eight, two-hour weekly sessions group psychological counselling program based on Cognitive-                                                                | Results showed meaningful differences in state and trait anxiety, depression and                                                                                                                                                                                                               | Greece      |

|                                   |      |                                                                                                  |                                                                                                                                                                                      |                                                       |                                                                                                                                                                                                        |                                                                                                                                                                                                                                                                                                                                        |         |
|-----------------------------------|------|--------------------------------------------------------------------------------------------------|--------------------------------------------------------------------------------------------------------------------------------------------------------------------------------------|-------------------------------------------------------|--------------------------------------------------------------------------------------------------------------------------------------------------------------------------------------------------------|----------------------------------------------------------------------------------------------------------------------------------------------------------------------------------------------------------------------------------------------------------------------------------------------------------------------------------------|---------|
|                                   |      | Diakogian<br>nis, G.                                                                             | Greek university students' anxiety                                                                                                                                                   | Counselling and Health                                | Behavioral Group Therapy on self-esteem from pre-treatment to post-treatment                                                                                                                           |                                                                                                                                                                                                                                                                                                                                        |         |
| Other Psychological Interventions | 2019 | Binder, P. E., Dundas, I., Stige, S. H., Hjeltnes, A., Woodfin, V., & Moltu, C.                  | Becoming Aware of Inner Self-Critique and Kinder Toward Self: A Qualitative Study of Experiences of Outcome After a Brief Self-Compassion Intervention for University Level Students | Frontiers in Psychology                               | Brief Self-Compassion Intervention                                                                                                                                                                     | Results showed a decrease in self-judgment and habitual negative self-directed thinking following the intervention. Participants were more aware of how they treated themselves and managed to stay more supportive and friendlier toward themselves                                                                                   | Norway  |
|                                   | 2019 | Marksteine r, T., Janke, S., & Dickhäuse r, O.                                                   | Effects of a brief psychological intervention on students' sense of belonging and educational outcomes: The role of students' migration and educational background                   | Journal of school psychology                          | Belonging intervention, aimed at reducing social disparities. It consisted in a brief reading-writing-exercise, teaching that worries about belonging are common among freshmen and diminish over time | For students without a migration background, the intervention had lasting positive effects on belonging, while for students with a migration background the positive effect diminished over time. Students with a migration background reported worse grades in the control condition and similar grades in the intervention condition | Germany |
|                                   | 2018 | Krispenz, A., & Dickhäuse r, O.                                                                  | Effects of an Inquiry-Based Short Intervention on State Test Anxiety in Comparison to Alternative Coping Strategies                                                                  | Frontiers in Psychology                               | Inquiry-based short intervention to reduce students' test anxiety                                                                                                                                      | After the intervention as well as 2 days later, individuals demonstrated significantly lower test anxiety than participants from the pooled control groups                                                                                                                                                                             | Germany |
|                                   | 2018 | McCarthy, B., Trace, A., O'Donovan, M., O'Regan, P., Brady-Nevin, C., O'Shea, M., ... Murphy, M. | Coping with stressful events: A pre-post-test of a psycho-educational intervention for undergraduate nursing and midwifery students                                                  | Nurse Education Today                                 | Psycho-educational intervention "Coping with Stressful Events"                                                                                                                                         | Restraint and mental disengagement showed lower post-intervention scores, while use of emotional and instrumental social support showed higher scores                                                                                                                                                                                  | Ireland |
|                                   | 2018 | Otermin-Cristeta, S., &                                                                          | Developing an intervention to overcome procrastination                                                                                                                               | Journal of Prevention & Intervention in the Community | Six meetings workshop based on behavioral and cognitive techniques, paradox intervention, and                                                                                                          | Interventions resulted to be effective in reducing procrastination sustainably                                                                                                                                                                                                                                                         | Germany |

|      |                                                              |                                                                                                                |                                                                   |                                                                                                                |                                                                                                                                                                                                                                                                                                                                                             |                |
|------|--------------------------------------------------------------|----------------------------------------------------------------------------------------------------------------|-------------------------------------------------------------------|----------------------------------------------------------------------------------------------------------------|-------------------------------------------------------------------------------------------------------------------------------------------------------------------------------------------------------------------------------------------------------------------------------------------------------------------------------------------------------------|----------------|
|      | Hautzinger, M.                                               |                                                                                                                |                                                                   | psychoeducation, aimed at overcoming general procrastination                                                   |                                                                                                                                                                                                                                                                                                                                                             |                |
| 2018 | Rose, A., McIntyre, R., & Rimes, K. A.                       | Compassion-Focused Intervention for Highly Self-Critical Individuals: Pilot Study                              | Behavioural and Cognitive Psychotherapy                           | Six-session intervention including different methods, from compassion-focused therapy to reduce self-criticism | There were statistically significant improvements between pre- and post-intervention for self-criticism, functional impairment, mood, self-esteem and maladaptive perfectionism, with medium to large effect sizes at both post-intervention and follow-up. Gains were maintained or increased between post-treatment and 2-month follow-up                 | United Kingdom |
| 2018 | Wood, E., Ohlsen, S., Thompson, J., Hulin, J., & Knowles, L. | The feasibility of brief dog-assisted therapy on university students stress levels: the PAwS study             | Journal of Mental Health                                          | Unstructured group interventions with a Guide Dog                                                              | Stress showed a statistically significant reduction immediately after the intervention                                                                                                                                                                                                                                                                      | United Kingdom |
| 2017 | Biolcati, R., Agostini, F., & Mancini, G.                    | Analytical psychodrama with college students suffering from mental health problems: Preliminary outcomes       | Research in Psychotherapy-Psychopathology Process And Outcome     | Analytical psychodrama                                                                                         | Results showed that analytical psychodrama was a suitable treatment for college students, as it actually reduced young adults' symptoms of depression and anxiety                                                                                                                                                                                           | Italy          |
| 2017 | Grajfoner, D., Harte, E., Potter, L. M., & McGuigan, N.      | The Effect of Dog-Assisted Intervention on Student Well-Being, Mood, and Anxiety                               | International journal of Environmental Research and Public Health | Short, 20 min, dog-assisted intervention                                                                       | Results showed that dog presence led to significant improvements in mood, well-being, and anxiety. The presence of a handler alongside the dog appeared to have a negative, and specific, effect on participant mood, with greater positive shifts when participants interacted with the dog alone, than when interacting with both the dog and the handler | UK             |
| 2017 | Matteucci, M. C.                                             | Attributional retraining and achievement goals: An exploratory study on theoretical and empirical relationship | European Review of Applied Psychology                             | Attributional Retraining (AR) intervention                                                                     | Results highlighted the effectiveness of AR treatment in restructuring self-defeating stable attributional explanations                                                                                                                                                                                                                                     | Italy          |
| 2017 | McClatchey, K., Boyce, M.                                    | Alcohol Brief Intervention in a university setting: A small-scale experimental study                           | Journal of Health Psychology                                      | Alcohol Brief Intervention (ABI) vs. information leaflet                                                       | Results showed no differences between the group that received the Alcohol Brief                                                                                                                                                                                                                                                                             | United Kingdom |



|      | &<br>Dombrow<br>ski, S. U.                                                  |                                                                                                                          |                                                  | Intervention and the group that received<br>an information leaflet                                                                                                                                                                                                        |                                                                                                                                                                                                                                                                                                                                                                                                                                                                                                                       |           |
|------|-----------------------------------------------------------------------------|--------------------------------------------------------------------------------------------------------------------------|--------------------------------------------------|---------------------------------------------------------------------------------------------------------------------------------------------------------------------------------------------------------------------------------------------------------------------------|-----------------------------------------------------------------------------------------------------------------------------------------------------------------------------------------------------------------------------------------------------------------------------------------------------------------------------------------------------------------------------------------------------------------------------------------------------------------------------------------------------------------------|-----------|
| 2017 | Victor, P.,<br>Teismann,<br>T., &<br>Willutzki,<br>U.                       | A Pilot Evaluation of a Behavioural and<br>Strengths-Based CBT Cognitive<br>Intervention Module with<br>College Students |                                                  | “Personal Model of Resilience”<br>(PMR) intervention, focused on<br>resilience strategies the person<br>already possesses                                                                                                                                                 | Compared with the control group, the<br>PMR group showed significant<br>improvements in distress, protective<br>factors and quality of life with medium to<br>large effect sizes                                                                                                                                                                                                                                                                                                                                      | Germany   |
| 2015 | Clarke, N.<br>C., Field,<br>M., &<br>Rose, A. K.                            | Evaluation of a Brief<br>Personalised Intervention for<br>Alcohol Consumption in<br>College Students                     | Plos One                                         | Alcohol Brief Personalized<br>Intervention (BPI), aimed at<br>encouraging students to lower<br>their drinking levels                                                                                                                                                      | RCT results showed a significant main<br>effect of time, $F(1, 101) = 5.7, p = .02,$<br>$\eta p^2 = .05$ , although post hoc t-tests<br>indicated that the RTC increased<br>between baseline and follow-up in the<br>active control group, $t(1, 51) = 2.05, p =$<br>.05, but not the BPI group, $t(1, 51) = -$<br>.97, $p = .34$ . However, the main effect of<br>group, $F(1, 101) = 1.38, p = .24$ , and the<br>group x time interaction, $F(1, 101) =$<br>1.06, $p = .30$ , were not statistically<br>significant | UK, US    |
| 2015 | Pinto, J. C.,<br>Loureiro,<br>N., &<br>Taveira, M.                          | Psychological Intervention in<br>Portuguese College Students:<br>Effects of Two Career Self-<br>Management Seminars      | Journal of College<br>Student<br>Development     | Career Self Management<br>Seminar, Version A, for<br>undergraduate students, and<br>Version B for postgraduate<br>students, aimed at supporting<br>students in career exploration,<br>goal setting, design and<br>implementation of action plans,<br>and decision-making. | Results showed a significant increase in<br>most of the cognitive, behavioral, and<br>affective career exploration dimensions<br>among both groups.                                                                                                                                                                                                                                                                                                                                                                   | Portugal  |
| 2014 | Härkäpää,<br>K., Junttila,<br>O.,<br>Lindfors,<br>O. &<br>Jarvikoski,<br>A. | Changes in studying abilities<br>as perceived by students<br>attending psychotherapy                                     | British Journal<br>Oof Guidance &<br>Counselling | Rehabilitative psychotherapy:<br>short-term solution-focused<br>therapy, short-term<br>psychodynamic psychotherapy<br>and long-term psychodynamic<br>psychotherapy with the aim to<br>support the study process                                                           | The results of this study showed many<br>kinds of positive changes in the<br>psychological resources and studying<br>ability of students participating in<br>psychotherapy; when psychotherapy is<br>arranged with the aim to support the<br>study process, good connections<br>between psychotherapy, study tutoring<br>and career guidance are needed                                                                                                                                                               | Finland   |
| 2014 | Ouweneel,<br>E., Le<br>Blanc, P.                                            | On Being Grateful and Kind:<br>Results of Two Randomized<br>Controlled Trials on Study-                                  | Journal<br>Psychology                            | of Two positive interventions<br>aimed at increasing general<br>happiness, modified for the                                                                                                                                                                               | The gratitude intervention showed a<br>significant positive effect on daily ds<br>positive emotions only, while the                                                                                                                                                                                                                                                                                                                                                                                                   | Netherlan |

|             |      |                                                                                                                                                                              |                                         |                                                                                                                                                                                      |                                                                                                                                                                                                                                                                                                                                                                                                                                                                                                                                                                                                     |                |
|-------------|------|------------------------------------------------------------------------------------------------------------------------------------------------------------------------------|-----------------------------------------|--------------------------------------------------------------------------------------------------------------------------------------------------------------------------------------|-----------------------------------------------------------------------------------------------------------------------------------------------------------------------------------------------------------------------------------------------------------------------------------------------------------------------------------------------------------------------------------------------------------------------------------------------------------------------------------------------------------------------------------------------------------------------------------------------------|----------------|
|             |      | M., & Related Emotions and Schaufeli, Academic Engagement W. B.                                                                                                              |                                         | academic context. These interventions focused on thoughts of gratitude and acts of kindness, respectively                                                                            | kindness intervention showed a positive influence on both positive emotions and academic engagement, though not in the long run. Results showed no effects on negative emotions in either of the two interventions                                                                                                                                                                                                                                                                                                                                                                                  |                |
|             | 2013 | Ciucur, D. A Transactional Analysis Group Psychotherapy Programme for Improving the Qualities and Abilities of Future Psychologists                                          | Procedia Social and Behavioral Sciences | Transactional Analysis Group Psychotherapy Programme, aimed at improving psychology students' abilities connected to their profession                                                | The implementation of the Programme contributed to increase psychology students' qualities and abilities necessary for working as psychologists. Statistically significant differences were also found within other psychological traits, which were not initially included among the specific qualities and abilities of the profession of psychologist: Self Acceptance ( $z=-2.062$ , $p=.05$ , ( $p=.039$ ) and Creativity ( $z=-2.355$ , $p=.05$ , ( $p=.019$ )                                                                                                                                | Romania        |
|             | 2012 | Ostafin, B. When wanting to change is not enough: automatic appetitive processes moderate the effects of a brief alcohol intervention in hazardous-drinking college students | Addiction Science & Clinical Practice   | Single-session intervention designed to increase motivation to reduce alcohol consumption                                                                                            | Compared with the control group, those in the intervention condition showed higher readiness to change drinking at the end of the baseline session but did not show decreased drinking quantity at follow-up. Automatic alcohol-approach associations moderated the effects of the intervention on change in drinking quantity. Among participants in the intervention group, those with weak automatic alcohol-approach associations showed greater reductions in the amount of alcohol consumed per occasion at follow-up compared with those with strong automatic alcohol-approach associations | Netherlands    |
| Mindfulness | 2020 | Shuai, R., Ultra-brief breath counting (mindfulness) training promotes recovery from stress-induced alcohol-seeking in student drinkers                                      | Addictive Behaviors                     | Brief training of one component of mindfulness (i.e., breath counting) to reduce drinkers' sensitivity to the effect of noise stress on subjective mood and alcohol-seeking behavior | Results showed that the breath counting versus control intervention improved subjective mood relative to baseline, attenuated the worsening of subjective mood produced by stress induction, and accelerated recovery from a stress induced increase in alcohol-seeking behavior                                                                                                                                                                                                                                                                                                                    | United Kingdom |

|      |                                                                                              |                                                                                                                                                               |                         |        |                                                                                                                                                                                                                                                                                    |                                                                                                                                                                                                                                                                                                                  |                |
|------|----------------------------------------------------------------------------------------------|---------------------------------------------------------------------------------------------------------------------------------------------------------------|-------------------------|--------|------------------------------------------------------------------------------------------------------------------------------------------------------------------------------------------------------------------------------------------------------------------------------------|------------------------------------------------------------------------------------------------------------------------------------------------------------------------------------------------------------------------------------------------------------------------------------------------------------------|----------------|
| 2019 | Recabarren, R. E., Gaillard, C., Guillod, M., & Martin-Soelch, C.                            | Short-Term Effects of a Multidimensional Stress Prevention Program on Quality of Life, Well-Being and Psychological Resources. A Randomized Controlled Trial  | Frontiers in Psychiatry | in     | Multidimensional stress prevention program, integrating mindfulness-based activities, cognitive and behavioral strategies, social skills, and emotional regulation exercises                                                                                                       | Results showed a significant reduction of psychological symptoms, including anxiety, interpersonal problems, and symptoms of pain; and a significant increase in quality of life, sense of coherence, and self-compassion in students who participated in the intervention program compared to the control group | Switzerland    |
| 2018 | Galante, J., Dufour, G., Vainre, M., Wagner, A. P., Stochl, J., Benton, A., ... Jones, P. B. | A mindfulness-based intervention to increase resilience to stress in university students (the Mindful Student Study): a pragmatic randomised controlled trial | Lancet Health           | Public | 8 weeks mindfulness courses, the "Mindfulness Skills for Students" aimed at improving students' resilience to stress                                                                                                                                                               | The mindfulness course reduced distress scores during the examination period compared with support as usual                                                                                                                                                                                                      | United Kingdom |
| 2018 | Haukaas, R. B., Gjerde, I. B., Varting, G., Hallan, H. E., & Solem, S.                       | A Randomized Controlled Trial Comparing the Attention Training Technique and Mindful Self-Compassion for Students With Symptoms of Depression and Anxiety     | Frontiers in Psychology | in     | Attention Training Technique (ATT) vs. Mindful Self-Compassion (MSC). ATT is a 12-minutes auditory exercise designed to strengthen attentional control and promote external focus of attention, while MSC uses guided meditation and exercises designed to promote self-compassion | Participants in both groups showed significant reductions in symptoms of anxiety and depression, accompanied by significant increases in mindfulness, self-compassion, and attention flexibility post-intervention. These results were maintained at 6-month follow-up                                           | Norway         |
| 2018 | Lynch, S., Gander, M., Nahar, A., Kohls, N., & Walach, H.                                    | Mindfulness-Based Coping With University Life: A Randomized Wait-List Controlled Study                                                                        | Sage Open               |        | 8-week program of Mindfulness-Based Coping With University Life (MBCUL), aimed at helping students bring mindful awareness to their academic work, stress management, approach to communication and relationships, and health                                                      | A significant decrease in anxiety, depression, and perceived stress was found in the MBCUL group compared with controls                                                                                                                                                                                          | United Kingdom |
| 2018 | Ștefan, A., Căpraru, C., & Szilágyi, M.                                                      | Investigating effects and mechanisms of a mindfulness-based stress reduction intervention in a sample of college students at risk for social anxiety          | Mindfulness             |        | 6-week mindfulness-based stress reduction (MBSR) program in students at risk for social anxiety                                                                                                                                                                                    | MBSR participation led to significant reductions in social anxiety and perceived stress. Significant post-intervention differences in favor of the MBSR group compared to the wait list control group were found for self-                                                                                       | Romania        |

|                      |      |                                                                                                    |                                                                                                                                                                                      |                                                         |                                                                                                                                                                                   |                                                                                                                                                                                                                                                                                                                                     |                |
|----------------------|------|----------------------------------------------------------------------------------------------------|--------------------------------------------------------------------------------------------------------------------------------------------------------------------------------------|---------------------------------------------------------|-----------------------------------------------------------------------------------------------------------------------------------------------------------------------------------|-------------------------------------------------------------------------------------------------------------------------------------------------------------------------------------------------------------------------------------------------------------------------------------------------------------------------------------|----------------|
|                      |      |                                                                                                    |                                                                                                                                                                                      |                                                         |                                                                                                                                                                                   | compassion and acceptance, but not for positive reinterpretation                                                                                                                                                                                                                                                                    |                |
|                      | 2015 | Gallejo, J., Aguilar-Parra, J. M., Cangas, A. J., Langer, A. I., & Mañas, I.                       | Effect of a mindfulness program on stress, anxiety and depression in university students                                                                                             | The Spanish Journal of Psychology                       | Mindfulness training vs. physical education vs. no intervention                                                                                                                   | Students in the mindfulness group showed higher reduction of depression, anxiety and stress, than students in the physical education group and in the control group                                                                                                                                                                 | Spain          |
|                      | 2015 | Halland, E., De Vibe, M., Solhaug, I., Friborg, O., Rosenving, J. H., Tyssen, R., ... Bjørndal, A. | Mindfulness training improves problem-focused coping in psychology and medical students: Results from a randomized controlled trial                                                  | College Journal                                         | Student 7-week mindfulness-based stress reduction (MBSR) program                                                                                                                  | Students receiving mindfulness training increased their use of problem-focused coping, compared to the control group. In addition, students with high scores on neuroticism benefitted from the intervention in terms of reduced avoidance-focused coping, and an increase in seeking social support, compared to the control group | Norway         |
| Online Interventions | 2020 | Turner, L., Galante, J., Vainre, M., Stochl, J., Dufour, G., & Jones, P. B.                        | Immune dysregulation among students exposed to exam stress and its mitigation by mindfulness training: findings from an exploratory randomized trial                                 | Scientific reports                                      | 8-week mindfulness course vs. support as usual, aimed at studying immune dysregulation in students who were exposed to progressively greater stress as the exam period approached | Results found no evidence that mindfulness training was able to buffer the effects of psychological distress on healthy participants' immune system                                                                                                                                                                                 | United Kingdom |
|                      | 2019 | Bruijninks, S., Sijbrandij, M., & Huibers, M.                                                      | The effects of retrieval versus rehearsal of online problem-solving therapy sessions on recall, problem-solving skills and distress in distressed individuals: An experimental study | Journal of Behavior Therapy and Experimental Psychiatry | Four weekly sessions of online Problem-Solving Therapy (PST) aimed at improving memory for the content of therapy sessions                                                        | Retrieval led to overall higher recall, but this difference disappeared when controlling for the time spent on retrieval versus rehearsal. Retrieval did not lead to better problem-solving skills or less distress, compared to rehearsal.                                                                                         | Netherlands    |
|                      | 2019 | Cook, L., Mostazir, M., & Watkins, E.                                                              | Reducing Stress and Preventing Depression (RESPOND): Randomized Controlled Trial of Web-Based Rumination-Focused Cognitive Behavioral                                                | Journal of medical Internet research                    | Web-based Rumination-focused Cognitive Behavioral Therapy (i-RFCBT) aimed at preventing the incidence of major depression vs. usual care                                          | Guided i-RFCBT reduced the risk of depression by 34% compared to usual care. Participants with higher levels of baseline stress benefited most from the intervention. Significant improvements in rumination, worry, and depressive                                                                                                 | United Kingdom |

|      |                                                                                                    |                                                                                                                                                                                                                        |                                                          |                                                                                                                                                                                                                                    |                                                                                                                                                                                                                                                                                                                                                                                                                                                                                                            |                                  |
|------|----------------------------------------------------------------------------------------------------|------------------------------------------------------------------------------------------------------------------------------------------------------------------------------------------------------------------------|----------------------------------------------------------|------------------------------------------------------------------------------------------------------------------------------------------------------------------------------------------------------------------------------------|------------------------------------------------------------------------------------------------------------------------------------------------------------------------------------------------------------------------------------------------------------------------------------------------------------------------------------------------------------------------------------------------------------------------------------------------------------------------------------------------------------|----------------------------------|
|      |                                                                                                    | Therapy for High-Ruminating University Students                                                                                                                                                                        |                                                          |                                                                                                                                                                                                                                    | symptoms were found in the short-to-medium term                                                                                                                                                                                                                                                                                                                                                                                                                                                            |                                  |
| 2019 | Kählke, F., Berger, T., Schulz, A., Baumeister, H., Berking, M., Auerbach, R. P., ... Ebert, D. D. | Efficacy of an unguided internet-based self-help intervention for social anxiety disorder in university students: A randomized controlled trial                                                                        | International journal of methods in psychiatric research | Internet- and mobile-based interventions (IMIs) “StudiCare SAD” waiting list for social anxiety disorder (SAD)                                                                                                                     | Results showed moderate to large effect sizes in favor of StudiCare SAD compared with waiting list for SAD symptoms. Effects on all secondary outcomes (depression, quality of life, fear of positive evaluation, general psychopathology, and interpersonal problems) were significant and in favor of the intervention group                                                                                                                                                                             | Germany, Austria and Switzerland |
| 2018 | Norman, P., Cameron, D., Epton, T., Webb, T. L., Harris, P. R., Millings, A., & Sheeran, P.        | A randomized controlled trial of a brief online intervention to reduce alcohol consumption in new university students: Combining self-affirmation, theory of planned behaviour messages, and implementation intentions | British Journal of Health Psychology                     | Participants were randomly assigned to 3 different conditions: a two session of self-affirmation intervention; two sessions of Theory of Planned Behavior (TPB)-based messages; or two session focused on intention implementation | Participants who received the TPB messages had significantly less favorable cognitions about binge drinking (except perceived control), consumed fewer units of alcohol, engaged in binge drinking less frequently, and had less harmful patterns of alcohol consumption during their first 6 months at university.                                                                                                                                                                                        | United Kingdom                   |
| 2018 | Saleh, D., Camart, N., Sbeira, F., & Romo, L.                                                      | Can we learn to manage stress? A randomized controlled trial carried out on university students                                                                                                                        | Plos One                                                 | 4-sessions internet-based cognitive-behavioral program                                                                                                                                                                             | Self-esteem scores of the control group were significantly higher than those of the experimental group at the pre-intervention stage, but this difference disappeared at the post-intervention and follow-up stages. Effects were observed in the experimental group at both the post-intervention and follow-up stages for self-esteem, perceived stress, satisfaction in studies, and in the somatic symptoms, anxiety and insomnia and severe depression. No effects were observed in the control group | France                           |
| 2018 | Tello, N., Bocage-Barthélem, Y.,                                                                   | Evaluative conditioning: A brief computer-delivered intervention to reduce college student drinking                                                                                                                    | Addictive Behaviors                                      | Brief computer-delivered intervention based on evaluative conditioning (EC)                                                                                                                                                        | Results showed that EC did not change the implicit evaluation of alcohol, $d = .01$ , 95% CI $[-.35, .35]$ . However, the EC reduced drinking behavior, $d = .37$ , 95                                                                                                                                                                                                                                                                                                                                     | France                           |

|      |                                                                                                          |                                                                                                                                                             |                                |        |                                                                                                                                                                                                                         |                                                                                                                                                                                                                                                                                                                                  |                |
|------|----------------------------------------------------------------------------------------------------------|-------------------------------------------------------------------------------------------------------------------------------------------------------------|--------------------------------|--------|-------------------------------------------------------------------------------------------------------------------------------------------------------------------------------------------------------------------------|----------------------------------------------------------------------------------------------------------------------------------------------------------------------------------------------------------------------------------------------------------------------------------------------------------------------------------|----------------|
|      | Dandaba, M., Jaafari, N., & Chatard, A.                                                                  |                                                                                                                                                             |                                |        |                                                                                                                                                                                                                         | %CI [.01, 0.72]. This effect was independent of hazardous drinking behavior, but it was especially pronounced among participants with the most positive implicit evaluation of alcohol before the intervention                                                                                                                   |                |
| 2016 | Kvillemo, P., Brandberg, Y., & Bränström, R.                                                             | Feasibility and Outcomes of an Internet-Based Mindfulness Training Program: A Pilot Randomized Controlled Trial                                             | Jmir Health                    | Mental | 8-week mindfulness training program vs Internet-based 4-week expressive writing program                                                                                                                                 | There was no statistically significant intervention effect for the mindfulness intervention compared to the active control intervention                                                                                                                                                                                          | Sweden         |
| 2016 | Räsänen, P., Lappalainen, P., Muotka, J., Tolvanen, A., & Lappalainen, R.                                | An online guided ACT intervention for enhancing the psychological wellbeing of university students: A randomized controlled clinical trial                  | Behaviour Research and Therapy |        | Online Acceptance and Commitment Therapy intervention (iACT)                                                                                                                                                            | The iACT participants showed significantly higher gains in wellbeing, life satisfaction, and mindfulness skills. Moreover, iACT participants' self-reported stress and depression were significantly reduced compared to the participants in the control group. These benefits were maintained over a 12-months follow-up period | Finland        |
| 2016 | Richards, D., Timulak, L., Rashleigh, C., McLoughlin, O., Colla, A., Joyce, C., ... Anderson-Gibbons, M. | Effectiveness of an internet-delivered intervention for generalized anxiety disorder in routine care: A randomised controlled trial in a student population | Internet interventions         |        | Internet-delivered CBT intervention, Calming Anxiety                                                                                                                                                                    | Both treatment and waiting list conditions displayed significant decreases in anxiety symptoms post-treatment, but there was no significant between-group effect                                                                                                                                                                 | Irish          |
| 2015 | Cameron, D., Epton, T., Norman, P., Sheeran, P., Harris,                                                 | A theory-based online health behaviour intervention for new university students (U@Uni:LifeGuide): results from a repeat randomized controlled trial        | Trials                         |        | The intervention consisted of a self-affirmation manipulation, health messages based on the theory of planned behaviour and implementation intention tasks. Participants were followed-up 1 and 6 months after starting | Intention-to-treat analyses indicated that the intervention had a non-significant effect on the primary outcomes, although the effect of the intervention on fruit and vegetable intake was significant in the per-protocol analyses                                                                                             | United Kingdom |

|      |                                                                                                                            |                                                                                                                                                                 |                                                |                                                                                                                                               |                                                                                                                                                                                                                                                                                                                                                                                  |                |
|------|----------------------------------------------------------------------------------------------------------------------------|-----------------------------------------------------------------------------------------------------------------------------------------------------------------|------------------------------------------------|-----------------------------------------------------------------------------------------------------------------------------------------------|----------------------------------------------------------------------------------------------------------------------------------------------------------------------------------------------------------------------------------------------------------------------------------------------------------------------------------------------------------------------------------|----------------|
|      | P. R.,<br>Webb, T.<br>L., ...<br>Shah, I.                                                                                  |                                                                                                                                                                 |                                                | university. Also see the<br>intervention at the following link                                                                                |                                                                                                                                                                                                                                                                                                                                                                                  |                |
| 2015 | Canale, N.,<br>Vieno, A.,<br>Santinello,<br>M.,<br>Chieco, F.,<br>&<br>Andriolo,<br>S.                                     | The efficacy of computerized alcohol intervention tailored to drinking motives among college students: a quasi-experimental pilot study                         | The American Journal of Drug and Alcohol Abuse | Computer-delivered intervention aimed at preventing alcohol abuse and its adverse consequences                                                | Results showed a significant interaction between intervention condition and hazardous drinkers at baseline. For hazardous drinkers at baseline, the alcohol intervention results showed a significant decrease in frequency and quantity of alcohol use at follow-up, while no differences were observed between intervention conditions for non-hazardous drinkers at baseline. | Italy          |
| 2014 | Epton, T.,<br>Norman, P.,<br>Dadzie, A. S.,<br>Harris, P.<br>R., Webb,<br>T. L.,<br>Sheeran,<br>P., ...<br>Shah, I.        | A theory-based online health behaviour intervention for new university students (U@Uni): results from a randomised controlled trial                             | Bmc Public Health                              | Theory-based online health behavior intervention, based on self-affirmation theory, Theory of Planned Behaviour and implementation intentions | The intervention had a statistically significant effect on smoking status at 6-month follow-up, with fewer smokers in the intervention arm (8.7%) than in the control arm (13.0%)                                                                                                                                                                                                | United Kingdom |
| 2013 | Bewick, B.<br>M., West,<br>R. M.,<br>Barkham,<br>M.,<br>Mulhern,<br>B.,<br>Marlow,<br>R., Traviss,<br>G., & Hill,<br>A. J. | The effectiveness of a Web-based personalized feedback and social norms alcohol intervention on United Kingdom university students: randomized controlled trial | Journal of Medical Internet Research           | Web-based intervention, providing instant personalized feedback on alcohol consumption                                                        | Participants who completed assessments showed a reduced alcohol consumption. Further reductions were found for those allocated to receive the intervention, and additional reductions were predicted as the number of visits to the intervention website increased                                                                                                               | UK             |
| 2013 | Horgan, A.,<br>McCarthy,<br>G., &<br>Sweeney, J.                                                                           | An evaluation of an online peer support forum for university students with depressive symptoms                                                                  | Archives of Psychiatric Nursing                | Depression peer-support Web site                                                                                                              | Results showed no statistical significance between pre-/post-test                                                                                                                                                                                                                                                                                                                | Ireland        |
| 2013 | Sharry, J.,<br>Davidson,                                                                                                   | A Service-Based Evaluation of a Therapist-Supported                                                                                                             | Journal of Medical Internet Research           | Online, therapist-supported, cognitive-behavioral program for                                                                                 | Results showed a statistically significant (p < .001) decrease in self-reported                                                                                                                                                                                                                                                                                                  | Ireland        |

|                              |      |                                                                                       |                                                                                                                       |                                                     |                                                                                                                                                                            |                                                                                                                                                                                                                                                                                                                                                                                                                                                                                                                                |                |
|------------------------------|------|---------------------------------------------------------------------------------------|-----------------------------------------------------------------------------------------------------------------------|-----------------------------------------------------|----------------------------------------------------------------------------------------------------------------------------------------------------------------------------|--------------------------------------------------------------------------------------------------------------------------------------------------------------------------------------------------------------------------------------------------------------------------------------------------------------------------------------------------------------------------------------------------------------------------------------------------------------------------------------------------------------------------------|----------------|
|                              |      | R.,<br>McLoughlin, O., & Doherty, G.                                                  | Online Cognitive Behavioral Therapy Program for Depression                                                            |                                                     | depression. The program was specifically designed to address engagement issues, most notably by integrating online therapist support and communication within the platform | depressive symptomatology from pre-intervention (BDI-II mean = 25.47) to post-intervention (BDI-II mean = 15.53) with a large effect size (d=1.17)                                                                                                                                                                                                                                                                                                                                                                             |                |
|                              | 2011 | Lindenbergh, K., Moessner, M., Harney, J., McLaughlin, O., & Bauer, S.                | E-health for individualized prevention of eating disorders                                                            | Clinical Practice and Epidemiology in Mental Health | Internet-based program aimed at preventing eating disorders (ED) in college students                                                                                       | Results showed that support could be matched to individual requirements by providing Internet-delivered stepped-care modules that encouraged the user to seek support according to their personal preferences and needs                                                                                                                                                                                                                                                                                                        | Ireland        |
|                              | 2010 | Bewick, B. M., West, R., Gill, J., O'May, F., Mulhern, B., Barkham, M., & Hill, A. J. | Providing web-based feedback and social norms information to reduce student alcohol intake: a multisite investigation | Journal of Medical Internet Research                | Web-based intervention for student alcohol use                                                                                                                             | Results showed an effect of assessment across time, as students who completed at least 2 assessments more likely reduced their drinking. Moreover, being assigned to an intervention arm showed an effect that increased across time. Being male or being assigned to an intervention arm increased the odds of not completing all assessments. The number of units of alcohol consumed over the last week at registration, age, university educational institution, and readiness to change were not predictive of completion | UK             |
| App and Mobile Interventions | 2020 | Bendtsen, M., Müssener, U., Linderöth, C., & Thomas, K.                               | A Mobile Health Intervention for Mental Health Promotion Among University Students: Randomized Controlled Trial       | Jmir Mhealth and Uhealth                            | Fully automated Mobile health (mHealth) intervention on positive mental health, and anxiety and depression symptomatology                                                  | At follow-up, positive mental health was significantly higher in the intervention group compared with the control group (IRR = 1.067, 95% CI 1.024-1.112, p = .002). For both depression and anxiety symptomatology, the intervention group showed significantly lower scores at follow-up compared with the control group. Follow-up rates were lower than expected                                                                                                                                                           | Sweden         |
|                              | 2020 | Ponzo, S., Morelli, D., & Kawadler, S.                                                | Efficacy of the Digital Therapeutic Mobile App BioBase to Reduce Stress and Improve Mental Well-Being                 | Jmir Mhealth and Uhealth                            | Mobile app (BioBase) and paired wearable device (BioBeam) vs. waitlist control group, aimed at reducing anxiety and well-being                                             | 4-week intervention with the BioBase program significantly reduced anxiety and increased perceived well-being, with sustained effects at a 2-week follow-up.                                                                                                                                                                                                                                                                                                                                                                   | United Kingdom |



|      |                                                                                                             |                                                                                                                                                                                                        |                                                                  |                                                                                                                                                                                                                                          |                                                                                                                                                                                                                                                                                                                                                                                                                                                                                 |                |
|------|-------------------------------------------------------------------------------------------------------------|--------------------------------------------------------------------------------------------------------------------------------------------------------------------------------------------------------|------------------------------------------------------------------|------------------------------------------------------------------------------------------------------------------------------------------------------------------------------------------------------------------------------------------|---------------------------------------------------------------------------------------------------------------------------------------------------------------------------------------------------------------------------------------------------------------------------------------------------------------------------------------------------------------------------------------------------------------------------------------------------------------------------------|----------------|
|      | J. M., Hemmings, N. R., Bird, G., & Plans, D.                                                               | Among University Students: Randomized Controlled Trial                                                                                                                                                 |                                                                  | in university students with elevated levels of anxiety and stress                                                                                                                                                                        | Furthermore, a significant reduction in depression levels was found following the 4-week usage of BioBase                                                                                                                                                                                                                                                                                                                                                                       |                |
| 2019 | Brogli, E., Millings, A., & Barkham, M.                                                                     | Counseling with Guided Use of a Mobile Well-Being App for Students Experiencing Anxiety or Depression: Clinical Outcomes of a Feasibility Trial Embedded in a Student Counseling Service               | Jmir Mhealth and Uhealth                                         | Mobile phone well-being app, offered as an adjunct to face-to-face counseling                                                                                                                                                            | At the 6-months follow-up, treatment as usual clients' anxiety increased whereas intervention clients' anxiety decreased, and this group difference was statistically significant                                                                                                                                                                                                                                                                                               | United Kingdom |
| 2018 | Harrer, M., Adam, S. H., Fleischmann, R. J., Baumeister, H., Auerbach, R., Bruffaerts, R., ... Ebert, D. D. | Effectiveness of an internet- and app-based intervention for college students with elevated stress: Randomized controlled trial                                                                        | Journal of Medical Internet Research                             | Internet- and mobile-based stress intervention with feedback on demand vs. waitlist                                                                                                                                                      | Results indicated significant effects of the intervention for stress, anxiety, depression, college-related productivity, academic work impairment and other outcomes after 7 weeks (post-treatment). Response rates for stress symptoms were significantly higher for the intervention group compared with the waitlist control group at post-test (7 weeks). Effects were sustained at 3-month follow-up, and similar findings emerged in students with symptoms of depression | Germany        |
| 2018 | Noone, C., & Hogan, M. J.                                                                                   | A randomised active-controlled trial to examine the effects of an online mindfulness intervention on executive control, critical thinking and key thinking dispositions in a university student sample | BMC Psychology                                                   | Mindfulness meditation vs. sham meditation. The intervention content for both groups (experimental and control groups) was delivered through the Headspace online application, an application which provides guided meditations to users | Results showed significant increases in mindfulness dispositions and critical thinking scores were observed in both the mindfulness meditation and sham meditation groups. However, no significant effects of group allocation were observed for either primary or secondary measures                                                                                                                                                                                           | Ireland        |
| 2018 | Pérez-Jorge, D., Barragán-Medero, F., Gutiérrez-Barroso, J.,                                                | A synchronous tool for innovation and improvement of university communication, counseling and tutoring: The WhatsApp experience                                                                        | Eurasia Journal of Mathematics, Science and Technology Education | Mobile-learning (learning across multiple contexts, through social and content interactions, using personal electronic devices) in academic monitoring, counseling and tutoring of university students                                   | Results showed important improvements in those competences related to time efficiency, planning and organization, active learning, decision making and motivation                                                                                                                                                                                                                                                                                                               | Spain          |

|      |                                                                                              |                                                                                                                                                            |                                              |    |                                                                                                                                                                                                                                                                                                                                                                                                        |                                                                                                                                                                                                                                                                                                                                                                                                                                                                                                                                                                                                                                                                                 |        |
|------|----------------------------------------------------------------------------------------------|------------------------------------------------------------------------------------------------------------------------------------------------------------|----------------------------------------------|----|--------------------------------------------------------------------------------------------------------------------------------------------------------------------------------------------------------------------------------------------------------------------------------------------------------------------------------------------------------------------------------------------------------|---------------------------------------------------------------------------------------------------------------------------------------------------------------------------------------------------------------------------------------------------------------------------------------------------------------------------------------------------------------------------------------------------------------------------------------------------------------------------------------------------------------------------------------------------------------------------------------------------------------------------------------------------------------------------------|--------|
|      | & Castro-León, F.                                                                            |                                                                                                                                                            |                                              |    |                                                                                                                                                                                                                                                                                                                                                                                                        |                                                                                                                                                                                                                                                                                                                                                                                                                                                                                                                                                                                                                                                                                 |        |
| 2017 | Gajecki, M., Andersson, C., Rosendahl, I., Sinadinovic, K., Fredriksson, M., & Berman, A. H. | Skills training via smartphone app for university students with excessive alcohol consumption: A randomized controlled trial.                              | International Journal of Behavioral Medicine | of | Web-based app consisting of a main menu with two parts: (a) registration of alcohol consumption in standard glasses for each day of the past week, resulting in brief feedback and information on guidelines for hazardous drinking, and (b) a relapse prevention skills training menu offering two options: "say no to alcohol" or "feel better without alcohol"                                      | The proportion of participants with excessive alcohol consumption decreased in both the intervention and the waitlist groups, compared to controls, at first and second follow-ups. Secondary analyses showed reductions for the intervention group in quantity of drinking at first follow-up and in frequency of drinking at both follow-ups                                                                                                                                                                                                                                                                                                                                  | Sweden |
| 2016 | Müssener, U., Bendtsen, M., Karlsson, N., White, I. R., McCambridge, J., & Bendtsen, P.      | Effectiveness of Short Message Service Text-Based Smoking Cessation Intervention Among University Students A Randomized Clinical Trial                     | Jama Internal Medicine                       |    | NEXit core program, comprising a 1- to 4-weeks motivational phase during which participants can choose to set a stop date. The intervention group then received 157 text messages based on components of effective smoking cessation interventions for 12 weeks. The control group received 1 text every 2 weeks thanking them for participating in the study, with delayed access to the intervention | Primary outcome data were available for 783 (94.7%) of the intervention group and 719 (94.2%) of the control group. At baseline, participants were smoking a median (range) of 63 (1-238) and 70 (2-280) cigarettes per week, respectively. Eight-week prolonged abstinence was reported by 203 participants (25.9%) in the intervention group and 105 (14.6%) in the control group; 4-week point prevalence of complete cessation was reported by 161 (20.6%) and 102 (14.2%) participants, respectively, a mean (SD) of 3.9 (0.37) months after the quit date. The adjusted odds ratios (95% CIs) for these findings were 2.05 (1.57-2.67) and 1.56 (1.19-2.05), respectively | Sweden |
| 2014 | Bendtsen, M., & Bendtsen, P.                                                                 | Feasibility and User Perception of a Fully Automated Push-Based Multiple-Session Alcohol Intervention for University Students: Randomized Controlled Trial | Jmir Mhealth And Uhealth                     |    | Fully automated, push-based, multiple-sessions alcohol intervention delivered either by SMS or by email                                                                                                                                                                                                                                                                                                | Approximately 15% in both the SMS (19/136) and email groups (15/104) would have preferred the other mode of delivery. On the other hand, more students in the SMS group (46/229, 20.1%) stopped participating in the intervention during the 4-week period compared with the email group (10/193, 5.2%). In addition, 83.1% (113/136) in the SMS group stated that they read all or                                                                                                                                                                                                                                                                                             | Sweden |

|      |                                        |                                                                                                                                                         |                                        |                                                                                                                                                                                                                                                                  |                                                                                                                                                                                                                                                                                                                                                                                                                                       |         |
|------|----------------------------------------|---------------------------------------------------------------------------------------------------------------------------------------------------------|----------------------------------------|------------------------------------------------------------------------------------------------------------------------------------------------------------------------------------------------------------------------------------------------------------------|---------------------------------------------------------------------------------------------------------------------------------------------------------------------------------------------------------------------------------------------------------------------------------------------------------------------------------------------------------------------------------------------------------------------------------------|---------|
|      |                                        |                                                                                                                                                         |                                        |                                                                                                                                                                                                                                                                  | almost all the messages, compared with only 63.5% (66/104) in the email group                                                                                                                                                                                                                                                                                                                                                         |         |
| 2012 | Richards, D., Timulak, L., & Hevey, D. | A comparison of two online cognitive-behavioural interventions for symptoms of depression in a student population: The role of therapist responsiveness | Counselling and Psychotherapy Research | 8-weekly sessions of a self-administered online cognitive-behavioral treatment (cCBT; n = 51) and a therapist-assisted email cognitive-behavioral treatment for student with symptoms of depression. Psychological evaluation was completed at weeks 2, 4, and 6 | For both groups, pre-post within group effect sizes reported were large for depression and clinical outcomes, and these were maintained at follow-up. Perception of working alliance was similar in each group, but bond was significantly stronger for the eCBT condition. Working alliance correlated more positively with the outcome on depression for those in the eCBT condition than the cCBT condition, but not significantly | Ireland |
